# Supplementary material for: Fusion Toxin BLyS-Gelonin Inhibits Growth of Malignant Human B Cell Lines In Vitro and In Vivo
Source: PubMed Central journal article supplement (PMC3467252; doi:10.1371/journal.pone.0047361), 2012-10-09

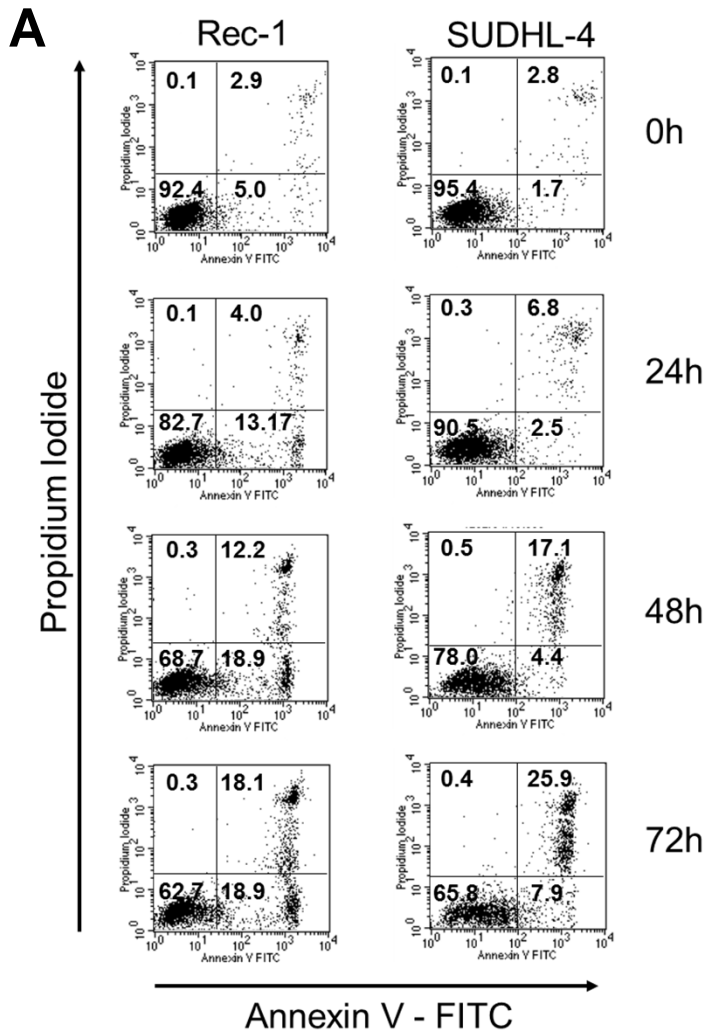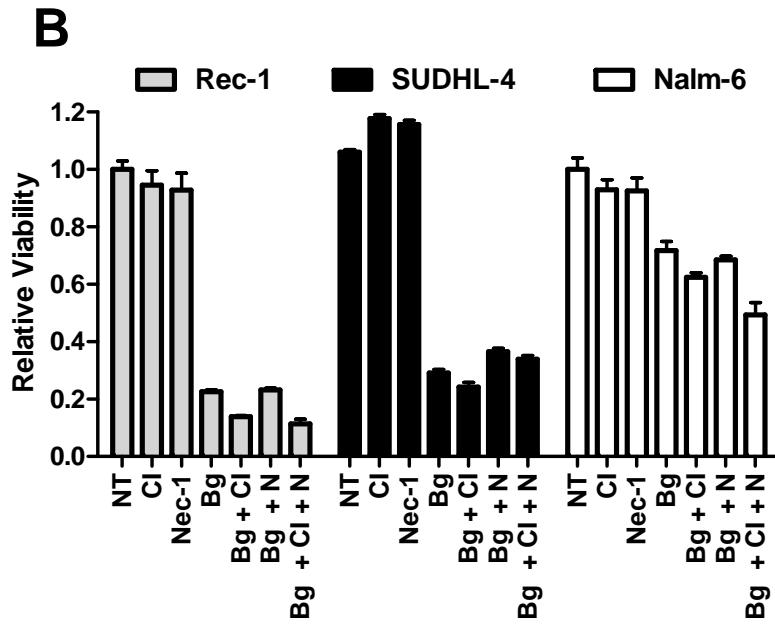

Supplement: pone.0047361.s003.pdf [file pone.0047361.s003.pdf]
