# Supplementary material for: Fusion Toxin BLyS-Gelonin Inhibits Growth of Malignant Human B Cell Lines In Vitro and In Vivo
Source: PubMed Central journal article supplement (PMC3467252; doi:10.1371/journal.pone.0047361), 2012-10-09

**A**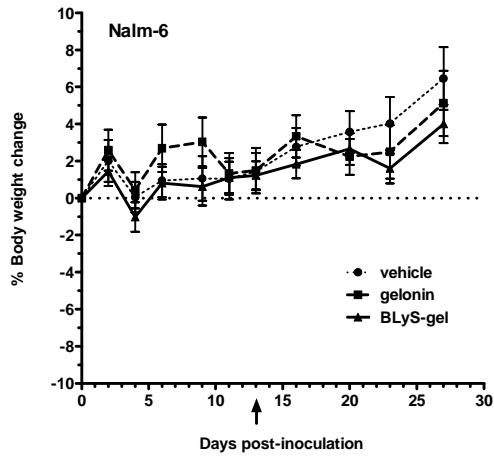**B**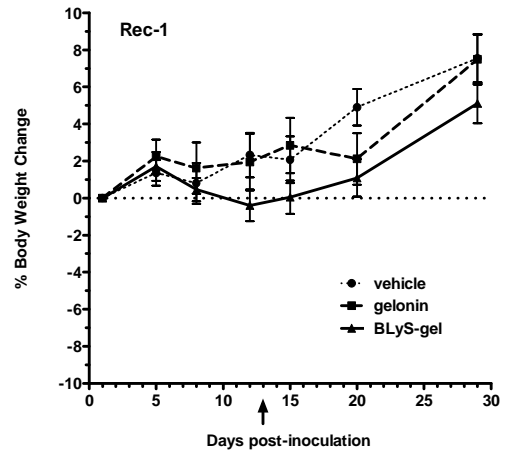**C**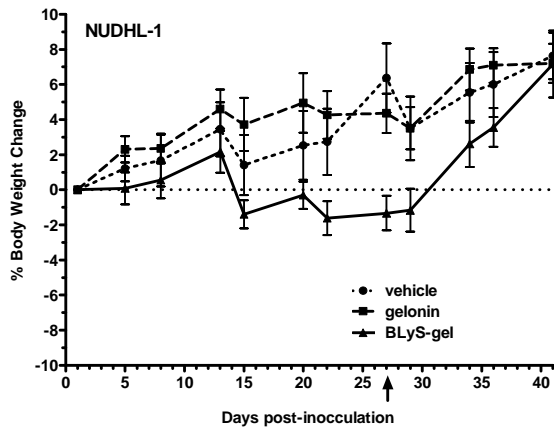**D**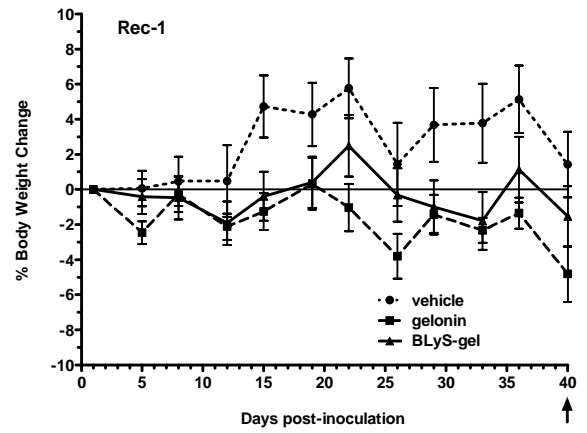

Supplement: pone.0047361.s006.pdf [file pone.0047361.s006.pdf]
