# Supplementary material for: Fusion Toxin BLyS-Gelonin Inhibits Growth of Malignant Human B Cell Lines In Vitro and In Vivo
Source: PubMed Central journal article supplement (PMC3467252; doi:10.1371/journal.pone.0047361), 2012-10-09

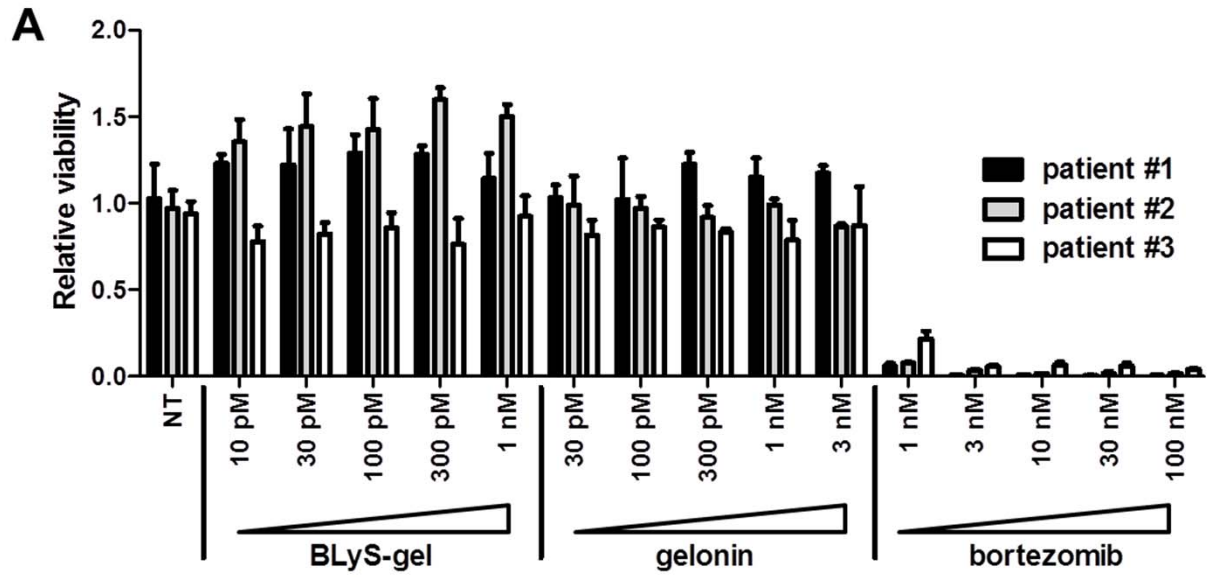

**B**

Cell surface expression of BCMA, TACI, and BR3

| Sample     | BCMA | TACI | BR3  | BLYS |
|------------|------|------|------|------|
| patient #1 | 0.4  | 1.8  | 52.3 | 66.8 |
| patient #2 | 0.9  | 2.5  | 36.1 | 28.1 |
| patient #3 | 5.4  | 15.6 | 96.8 | 70.7 |

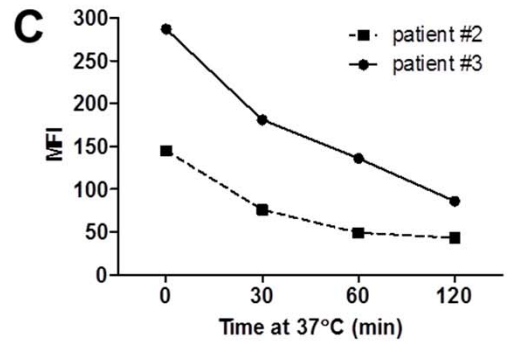

Supplement: pone.0047361.s007.pdf [file pone.0047361.s007.pdf]
