# Supplementary material for: Fusion Toxin BLyS-Gelonin Inhibits Growth of Malignant Human B Cell Lines In Vitro and In Vivo
Source: PubMed Central journal article supplement (PMC3467252; doi:10.1371/journal.pone.0047361), 2012-10-09
Supplement: pone.0047361.s008.pdf [file pone.0047361.s008.pdf]

**Supplementary Table 1.** BLyS-gel binds BLyS-receptors

| <b>Receptor</b> | <b>Ligand</b> | <b>Binding Affinity</b> |
|-----------------|---------------|-------------------------|
| anti-BLyS mAb   | BLyS-gel      | $k_d = 324 \pm 107$ pM  |
| anti-BLyS mAb   | BLyS          | $k_d = 250 \pm 119$ pM  |
| TACI-Fc         | BLyS-gel      | $k_d = 0.8 \pm 0.5$ nM  |
| TACI-Fc         | BLyS          | $k_d = 1.6 \pm 0.2$ nM  |
| BAFFR-Fc        | BLyS-gel      | $k_d = 2.6 \pm 1.4$ nM  |
| BAFFR-Fc        | BLyS          | $k_d = 2.2 \pm 0.7$ nM  |
| BCMA-Fc         | BLyS-gel      | $k_d = 6.2 \pm 2.5$ nM  |
| BCMA-Fc         | BLyS          | ND                      |

\* mean  $\pm$  95% CI, n=3
