# Supplementary material for: Fusion Toxin BLyS-Gelonin Inhibits Growth of Malignant Human B Cell Lines In Vitro and In Vivo
Source: PubMed Central journal article supplement (PMC3467252; doi:10.1371/journal.pone.0047361), 2012-10-09
Supplement: pone.0047361.s009.pdf [file pone.0047361.s009.pdf]

**Supplementary Table 2.** mBlyS concentration in blood of SCID mice (ng/ml)\*

| Sample | Days following i.v. injection of 10F4 (5 mg/kg) |      |     |     |      |      |
|--------|-------------------------------------------------|------|-----|-----|------|------|
|        | 0h                                              | 1d   | 2d  | 3d  | 4d   | 5d   |
| 1      | 69.2                                            | 2.1  | -   | -   | -    | -    |
| 2      | 74.2                                            | BLOQ | -   | -   | -    | -    |
| 3      | 85.8                                            | -    | 2.9 | -   | -    | -    |
| 4      | 74.5                                            | -    | 8.6 | -   | -    | -    |
| 5      | 81.9                                            | -    | -   | 2.1 | -    | -    |
| 6      | 87.9                                            | -    | -   | 2.9 | -    | -    |
| 7      | 90.8                                            | -    | -   | -   | BLOQ | -    |
| 8      | 79.4                                            | -    | -   | -   | 3.8  | -    |
| 9      | 95.5                                            | -    | -   | -   | -    | 6.2  |
| 10     | 91.4                                            | -    | -   | -   | -    | BLOQ |

\*values determined by quantitative ELISA using mBlyS standard curve

Abbreviations: BLOQ, below limit of quantitation (0.8 ng/ml)
