# Supplementary material for: Fusion Toxin BLyS-Gelonin Inhibits Growth of Malignant Human B Cell Lines In Vitro and In Vivo
Source: PLoS One. 2012 Oct 9;7(10):e47361. doi: 10.1371/journal.pone.0047361 (PMC3467252; doi:10.1371/journal.pone.0047361)
Supplement: Table S3 — hβ2M concentration in mouse serum. Quantification of human β2M levels in serum of mice inoculated with Rec-1 cells. (PDF) [file pone.0047361.s010.pdf]

**Supplementary Table 3.** h $\beta$ 2M concentration (ng/ml) in mouse serum\*

| Mouse | Week 1 | Week 2 | Week 3 | Week 4 | Week 5 | Week 6 |
|-------|--------|--------|--------|--------|--------|--------|
| 1     | BLOQ   | BLOQ   | BLOQ   | 6.90   | 8.20   | 8.39   |
| 2     | BLOQ   | BLOQ   | BLOQ   | 2.58   | 7.87   | 8.72   |
| 3     | BLOQ   | BLOQ   | BLOQ   | 3.26   | 8.83   | 8.27   |
| 4     | BLOQ   | BLOQ   | BLOQ   | 5.66   | 8.68   | 8.78   |

\*mice were injected i.v. with  $1 \times 10^6$  Rec-1 cells. Serum was collected each week and analyzed for the presence of human  $\beta$ 2-microglobulin (h $\beta$ 2M) by ELISA as described in Materials and Methods.
